# Supplementary material for: Barriers and enablers to a physician-delivered educational initiative to reduce low-acuity visits to the pediatric emergency department
Source: PLOS journal article supplement (doi:10.1371/journal.pone.0198181), 2018-05-29

**S2 Figure:** Weekly average of daily patient arrivals to the CHEO PED, 2013 to 2015.

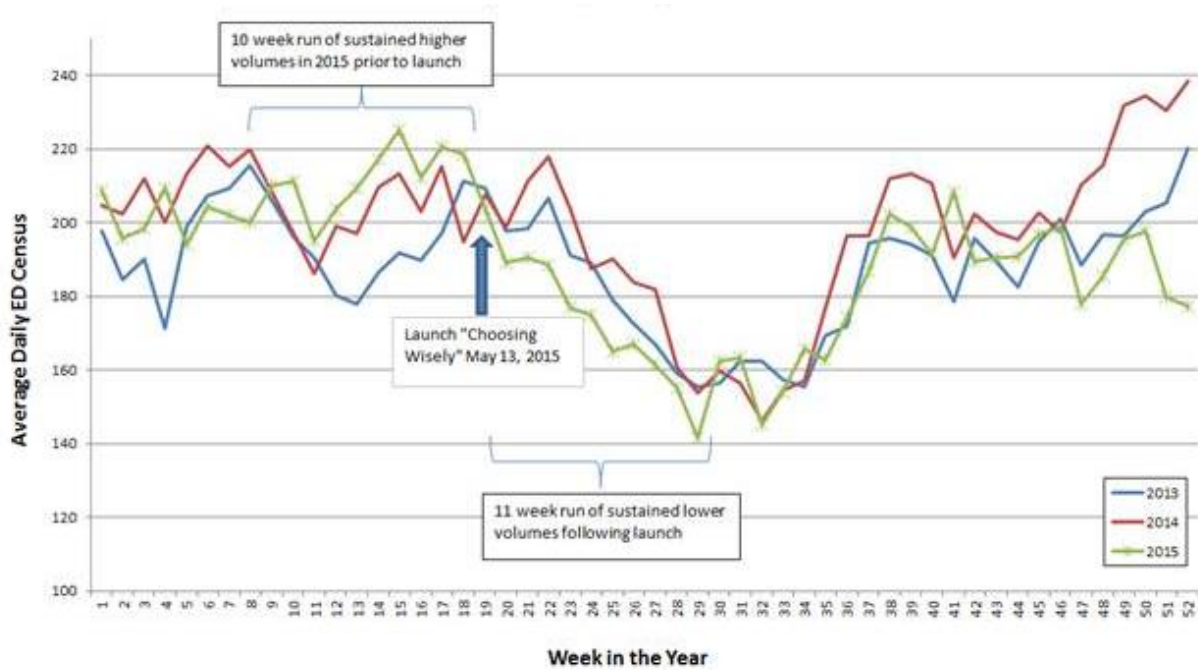

Supplement: S2 (10.1371/journal.pone.0198181.s002) [file journal.pone.0198181.s002]
